# Supplementary material
Source: PubMed Central journal article supplement (PMC3032534)
Supplement: NIHMS268018-supplement-Legends_for_movies.pdf [file NIHMS268018-supplement-Legends_for_movies.pdf]

## **Legends for Supporting Movies:**

### **Movie s1**

Spindle positioning and elongation in dividing QR.p cell. Centrosome in green, chromosome and plasma membrane in red (Strain RV83). The display rate is 7 frames/sec with total elapsed time of 960 sec. Anterior, left.

### **Movie s2**

Spindle positioning and elongation in dividing QR.a cell. Centrosome in green, chromosome and plasma membrane in red (Strain RV83). The display rate is 7 frames/sec with total elapsed time of 1212 sec. Anterior, left.

### **Movie s3**

Spindle positioning and elongation in dividing QR.a cell. Microtubules in green, chromosome and plasma membrane in red (Strain RV70). The display rate is 7 frames/sec with total elapsed time of 1680 sec. Anterior, left.

### **Movie s4**

Myosin II dynamics in cytokinetic QR.p cell. Myosin II in green, chromosome and plasma membrane in red (Strain RV84). The display rate is 7 frames/sec with total elapsed time of 460 sec. Anterior, left.

### **Movie s5**

Myosin II dynamics in cytokinetic QR.a cell. Myosin II in green, chromosome and plasma membrane in red (Strain RV84). The display rate is 7 frames/sec with total elapsed time of 480 sec. Anterior, left.

### **Movie s6**

Membrane dynamics in dividing QR.p cell. Plasma membrane in red (Strain RV53). The display rate is 15 frames/sec with total elapsed time of 955 sec. Anterior, left.

### **Movie s7**

Membrane dynamics in dividing QR.a cell. Plasma membrane in red (Strain RV53). The display rate is 15 frames/sec with total elapsed time of 935 sec. Anterior, left.

### **Movie s8**

Myosin II dynamics in cytokinetic QR.a cell of *pig-1* mutant. Myosin II in green, chromosome and plasma membrane in red (RV200). The display rate is 5 frames/sec with total elapsed time of 460 sec. Anterior, left.

### **Movie s9**

QR.aa cell undergoes programmed cell death. Aster is adjacent to QR.aa cell. Chromosome and plasma membrane in red. The display rate is 7 frames/sec with total elapsed time of 111 min. Anterior, left.

### **Movie s10**

QR.aa cell migrates and forms neuritis after CALI of myosin II during cytokinesis. Aster is adjacent to QR.aa cell. Chromosome and plasma membrane in red. The display rate is 7 frames/sec with total elapsed time of 165 min. Anterior, left.
